# Supplementary material
Source: PubMed Central journal article supplement (PMC3646404)
Supplement: pr400086y_si_001.pdf [file pr400086y_si_001.pdf]

# Global quantitative SILAC phosphoproteomics reveals differential phosphorylation is widespread between the procyclic and bloodstream form lifecycle stages of *Trypanosoma brucei*

Michael D. Urbaniak, David M. A. Martin and Michael A. J. Ferguson

Division of Biological Chemistry and Drug Discovery, College of Life Sciences, University of Dundee, Dundee DD1 5EH, UK.

## Supplementary Information:

**Table S1.** Bloodstream form cell dimensions measured by light scattering.

|                               | HMI9-T | HMI11-SILAC |
|-------------------------------|--------|-------------|
| Mean diameter / $\mu\text{M}$ | 3.94   | 4.10        |
| Mean volume / $\mu\text{M}^3$ | 36     | 40          |

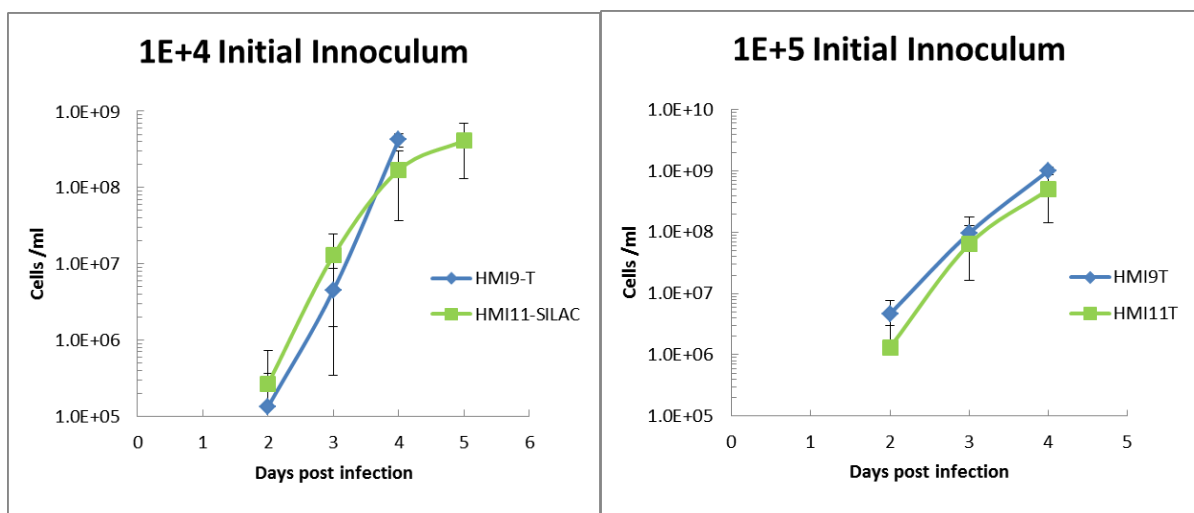

**Figure S1.** Rodent infectivity of bloodstream form *T. brucei* cultured in HMI9-T and HMI11-SILAC media. Bloodstream form cells grown HMI9-T or HMI11-SILAC +  $R_0K_0$  for >14 days prior to inoculation of female Balbc mice (three per condition) by inter peritoneal injection of  $1 \times 10^3$ ,  $1 \times 10^4$  or  $1 \times 10^5$  cells in the same media. Daily tail bleeds were used to monitor the number of parasites in the bloodstream using a haemocytometer, and animals were euthanized when the parasite burden exceeded  $5 \times 10^8$  cells/ml prior to overt distress.

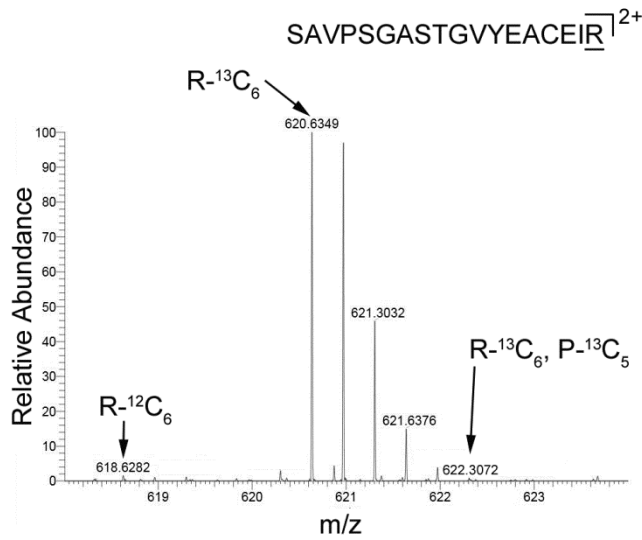

**Figure S2.** Efficiency of isotope incorporation in bloodstream form *T. brucei*. Mass spectrum of a doubly charged peptide from enolase (Tb927.10.2890) obtained after three days growth in HMI11-SILAC+R<sub>6</sub>K<sub>4</sub>.

**Figure S3 (overleaf).** Gene Ontology term enrichment for all phosphoproteins. Term-for-term enrichment,  $P < 0.01$ , uncorrected due to sample size. Each box contains the following information: GO term ID and description, Number of terms in population / Total number of terms in population, Number of terms in set / Total number of terms in set.

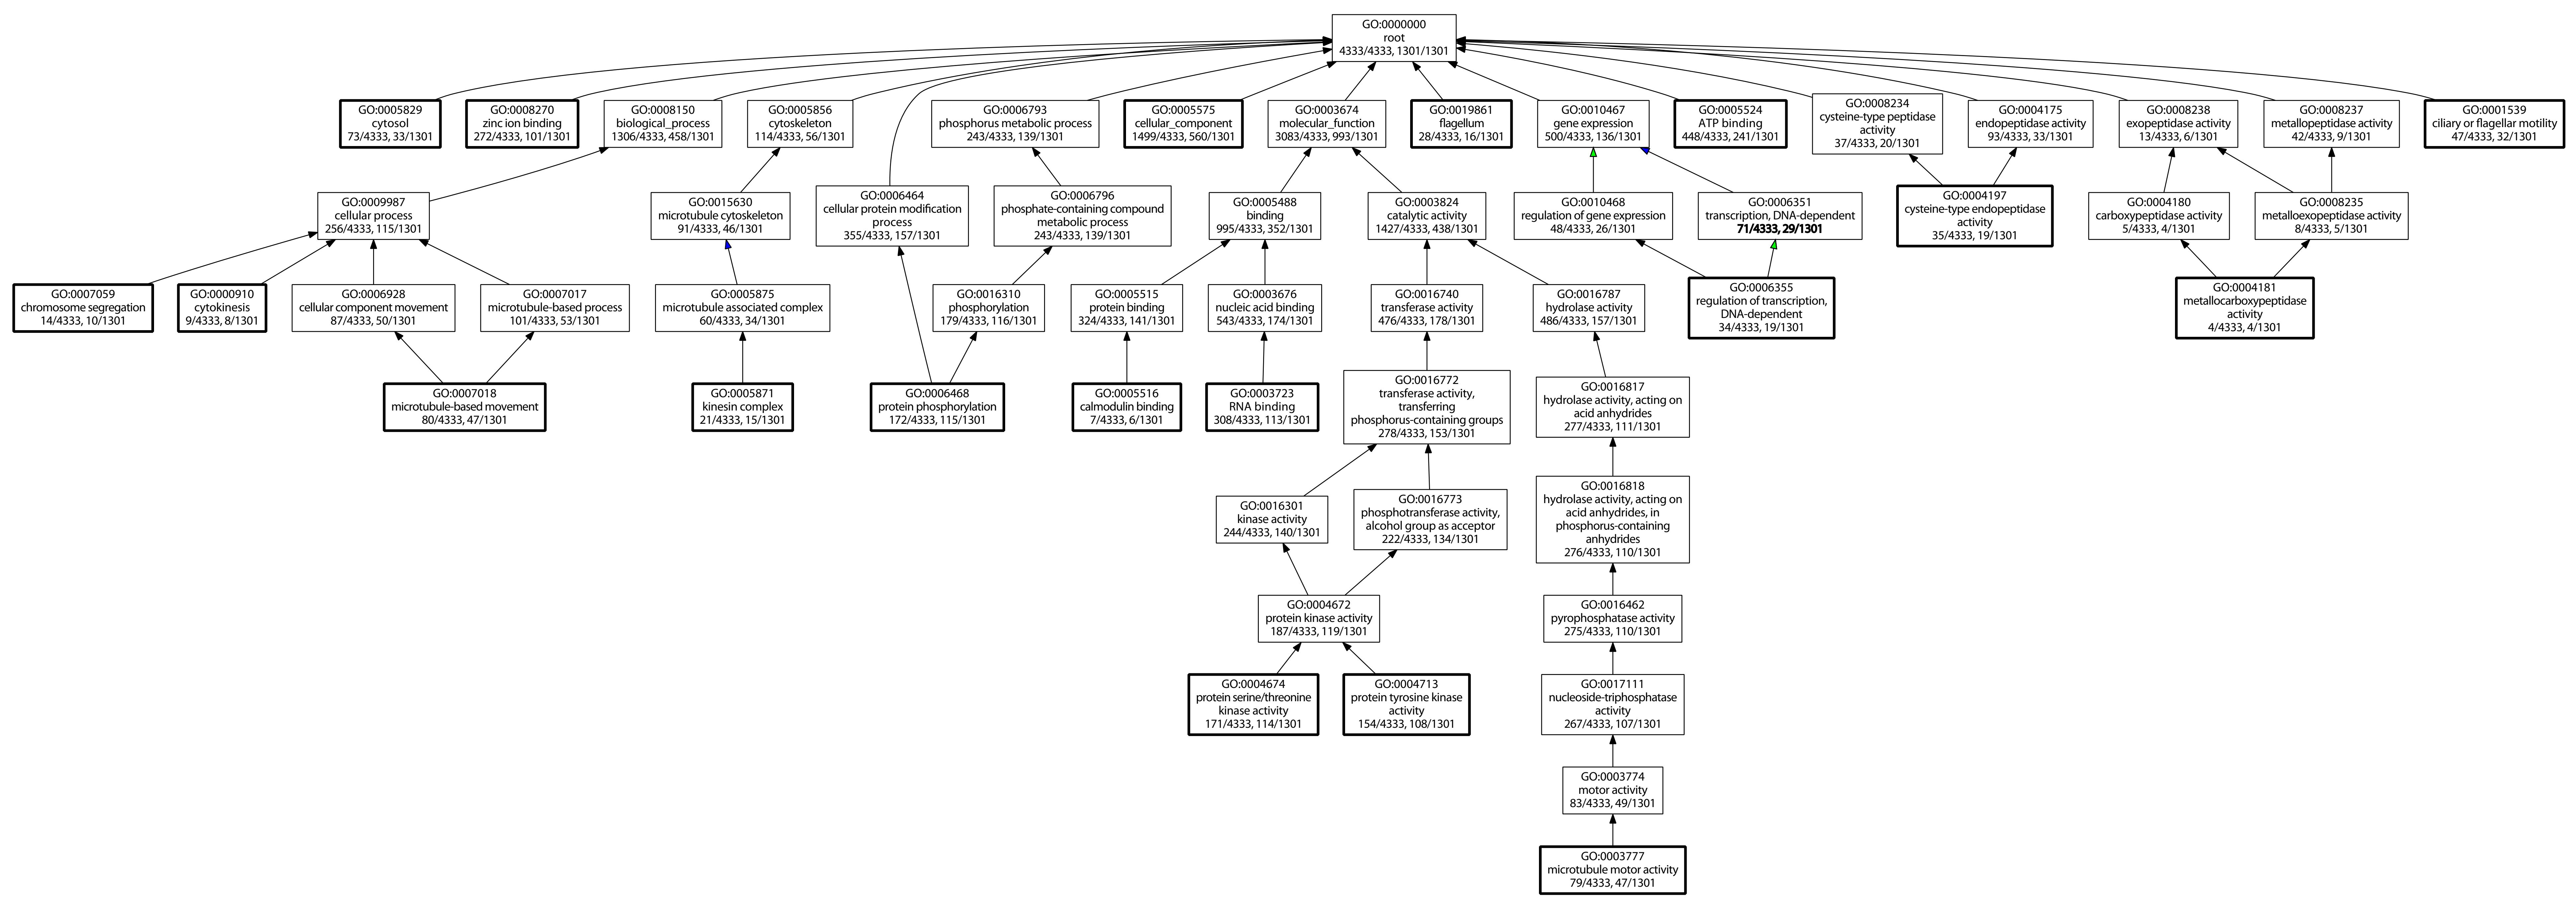

**Supplementary data supplied as separate files:**

Assignment of MS<sup>2</sup> spectra for protein kinase phosphorylation sites – pdfs contained in a zipped file.

**Table S2.** Protein groups including SILAC ratios

**Table S3.** Peptides including SILAC ratios

**Table S4.** Phosphorylation sites including SILAC ratios

**Table S5.** Phosphopeptides including SILAC ratios

**Table S6.** Manual validation of protein kinase of phosphorylation sites

**Table S7.** Phosphorylation sites > 10-fold up-regulated in bloodstream form

**Table S8.** Phosphorylation sites > 10-fold up-regulated in Procyclic form

**Table S9.** Phosphoproteins with phosphorylation sites differentially regulated between lifecycle Stages

This material is available free of charge via the Internet at <http://pubs.acs.org>
